# Supplementary material
Source: PubMed Central journal article supplement (PMC1312413)

**A**

NHS 2.5 20 min

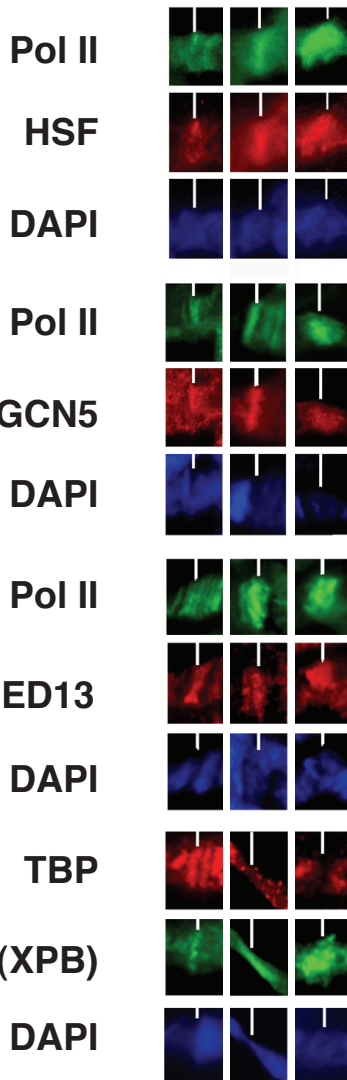**B**

NHS 2.5 20 min

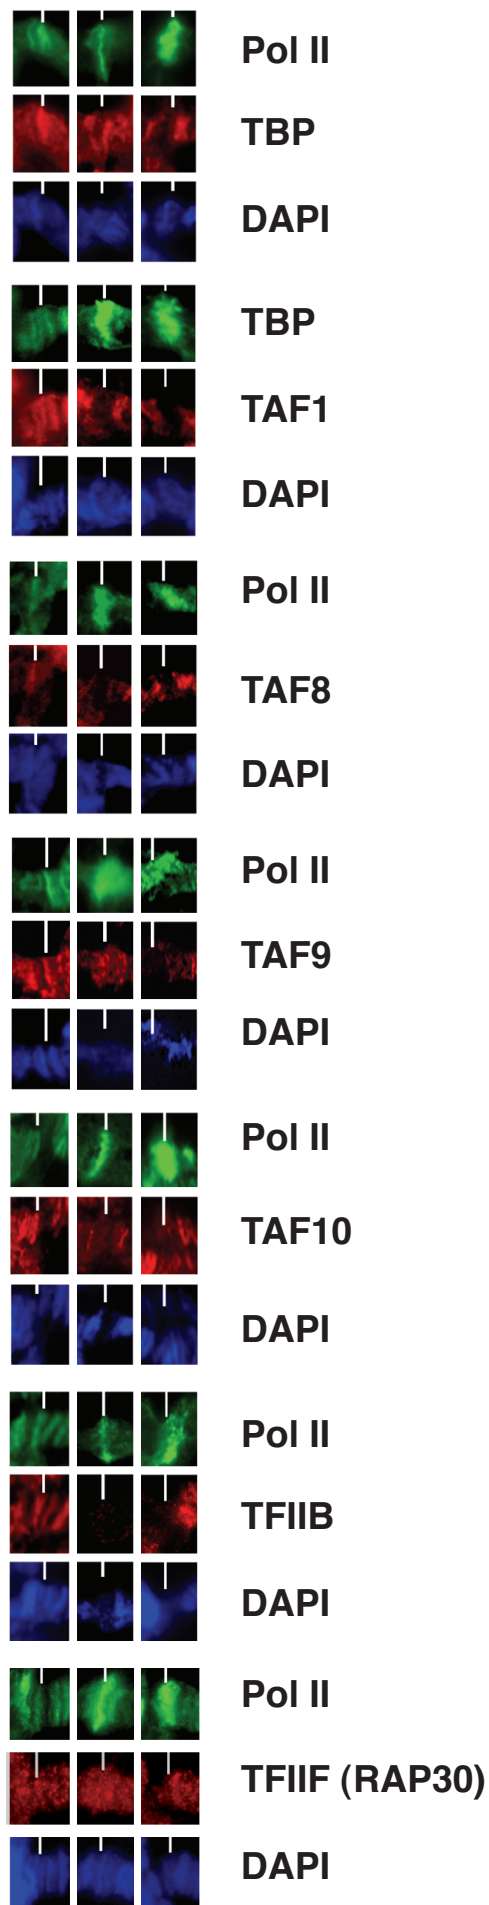

Supplement: pnas_0509063102_2.pdf [file pnas_0509063102_2.pdf]
